# Supplementary material
Source: PubMed Central journal article supplement (PMC2947317)

**Supplementary Material for**

**“Genome-wide association studies of gastric adenocarcinoma and esophageal squamous cell carcinoma identify a shared susceptibility locus in *PLCE1* at 10q23”**

**Christian C Abnet, Neal D Freedman, Nan Hu, Zhaoming Wang, Kai Yu, Xiao-Ou Shu, Jian-Min Yuan, Wei Zheng, Sanford M Dawsey, Linda M Dong, Maxwell P Lee, Ti Ding, You-Lin Qiao, Yu-Tang Gao, Woon-Puay Koh, Yong-Bing Xiang, Ze-Zhong Tang, Jin-Hu Fan, Chaoyu Wang, William Wheeler, Mitchell H Gail, Meredith Yeager, Jeff Yuenger, Amy Hutchinson, Kevin B Jacobs, Carol A Giffen, Laurie Burdett, Joseph F Fraumeni Jr, Margaret A Tucker, Wong-Ho Chow, Alisa M Goldstein, Stephen J Chanock & Philip R Taylor**

**Supplementary Table 1.** Description of studies and number of subjects included in the genome-wide scan phase, second phase, and combined phase by study and phenotype

|                               |                     |              | <b>Shanxi UGI Cancer Genetics Project</b>                      | <b>Linxian Nutrition Intervention Trial</b> | <b>Shanghai Men's Health Study</b>                                                        | <b>Shanghai Women's Health Study</b>                                                                                                                        | <b>Singapore Chinese Health Study</b>                                         |
|-------------------------------|---------------------|--------------|----------------------------------------------------------------|---------------------------------------------|-------------------------------------------------------------------------------------------|-------------------------------------------------------------------------------------------------------------------------------------------------------------|-------------------------------------------------------------------------------|
| <b>Abbreviation</b>           |                     |              | Shanxi                                                         | NIT                                         | SMHS                                                                                      | SWHS                                                                                                                                                        | SCHS                                                                          |
| <b>Design</b>                 |                     |              | Case-Control; Case only                                        | Cohort                                      | Cohort                                                                                    | Cohort                                                                                                                                                      | Cohort                                                                        |
| <b>Location</b>               |                     |              | Shanxi Province, PRC                                           | Henan Province, PRC                         | Shanghai, PRC                                                                             | Shanghai, PRC                                                                                                                                               | Singapore                                                                     |
| <b>Nested sampling method</b> |                     |              | Not applicable                                                 | Case-Cohort                                 | Incidence density                                                                         | Incidence density                                                                                                                                           | Incidence density                                                             |
| <b>Matching</b>               |                     |              | Sex<br>Age ( $\pm 5$ years)<br><i>For case-control portion</i> | Sex<br>Age (10 year groups)                 | Age ( $\pm 2$ years)<br>Biosample collection:<br>Time of day (AM:PM)<br>Month ( $\pm 1$ ) | Age ( $\pm 2$ years)<br>Menstrual period ( $\pm 1$ day)<br>Biosample collection:<br>Time of day (AM:PM)<br>Month ( $\pm 1$ )<br>Last meal ( $\leq 2$ hours) | Sex<br>Age ( $\pm 2$ years)<br>Dialect<br>Month of DNA collection ( $\pm 6$ ) |
| <b>Phase</b>                  | <b>Phenotype</b>    | <b>Total</b> |                                                                |                                             |                                                                                           |                                                                                                                                                             |                                                                               |
| <b>Genome-wide</b>            | Controls            | 2100         | 1650                                                           | 450                                         |                                                                                           |                                                                                                                                                             |                                                                               |
|                               | Gastric             | 1625         | 1368                                                           | 257                                         |                                                                                           |                                                                                                                                                             |                                                                               |
|                               | <i>Cardia</i>       | 1110         | 853                                                            | 257                                         |                                                                                           |                                                                                                                                                             |                                                                               |
|                               | <i>Noncardia</i>    | 515          | 515                                                            | 0                                           |                                                                                           |                                                                                                                                                             |                                                                               |
|                               | <i>Unclassified</i> | 0            | 0                                                              | 0                                           |                                                                                           |                                                                                                                                                             |                                                                               |
|                               | ESCC                | 1898         | 1399                                                           | 499                                         |                                                                                           |                                                                                                                                                             |                                                                               |
| <b>Second</b>                 | Controls            | 1202         | 104                                                            | 330                                         | 477                                                                                       | 54                                                                                                                                                          | 237                                                                           |
|                               | Gastric             | 615          | 50                                                             | 145                                         | 205                                                                                       | 0                                                                                                                                                           | 215                                                                           |
|                               | <i>Cardia</i>       | 103          | 28                                                             | 27                                          | 19                                                                                        | 0                                                                                                                                                           | 29                                                                            |
|                               | <i>Noncardia</i>    | 402          | 22                                                             | 118                                         | 147                                                                                       |                                                                                                                                                             | 115                                                                           |
|                               | <i>Unclassified</i> | 110          | 0                                                              | 0                                           | 39                                                                                        | 0                                                                                                                                                           | 71                                                                            |
|                               | ESCC                | 217          | 82                                                             | 52                                          | 34                                                                                        | 27                                                                                                                                                          | 22                                                                            |
| <b>Combined</b>               | Controls            | 3302         | 1754                                                           | 780                                         | 477                                                                                       | 54                                                                                                                                                          | 237                                                                           |
|                               | Gastric             | 2240         | 1418                                                           | 402                                         | 205                                                                                       | 0                                                                                                                                                           | 215                                                                           |
|                               | <i>Cardia</i>       | 1213         | 881                                                            | 284                                         | 19                                                                                        | 0                                                                                                                                                           | 29                                                                            |
|                               | <i>Noncardia</i>    | 917          | 537                                                            | 118                                         | 147                                                                                       | 0                                                                                                                                                           | 115                                                                           |
|                               | <i>Unclassified</i> | 110          | 0                                                              | 0                                           | 39                                                                                        | 0                                                                                                                                                           | 71                                                                            |
|                               | ESCC                | 2115         | 1481                                                           | 551                                         | 34                                                                                        | 27                                                                                                                                                          | 22                                                                            |
|                               | total               | 7657         | 4653                                                           | 1733                                        | 716                                                                                       | 81                                                                                                                                                          | 474                                                                           |

**Supplementary Table 2.** Associations between rs3781264 and gastric cardia cancer or ESCC separately in the Shanxi, NIT, and all studies combined using per allele models

| <b>Study</b> | <b>Cancer</b> | <b>SNP</b> | <b>MAF Controls</b> | <b>MAF Cases</b> | <b># controls</b> | <b># cases</b> | <b>P-value</b>         | <b>OR</b> | <b>(95% CI)</b> |
|--------------|---------------|------------|---------------------|------------------|-------------------|----------------|------------------------|-----------|-----------------|
| Shanxi       | Cardia        | rs3781264  | 15%                 | 23%              | 1648              | 853            | $1.02 \times 10^{-10}$ | 1.65      | (1.41-1.92)     |
| NIT          | Cardia        | rs3781264  | 14%                 | 22%              | 450               | 257            | $1.87 \times 10^{-4}$  | 1.72      | (1.29-2.30)     |
| Combined     | Cardia        | rs3781264  | 15%                 | 22%              | 3302              | 1213           | $1.06 \times 10^{-13}$ | 1.60      | (1.41-1.81)     |
|              |               |            |                     |                  |                   |                |                        |           |                 |
| Shanxi       | ESCC          | rs3781264  | 15%                 | 20%              | 1648              | 1466           | $4.26 \times 10^{-7}$  | 1.40      | (1.23-1.59)     |
| NIT          | ESCC          | rs3781264  | 13%                 | 17%              | 450               | 547            | 0.038                  | 1.28      | (1.01-1.61)     |
| Combined     | ESCC          | rs3781264  | 15%                 | 19%              | 3302              | 2115           | $7.30 \times 10^{-9}$  | 1.38      | (1.23-1.53)     |

**Supplementary Table 3.** Association between new and *a priori* SNPs reported by other GWAS for gastric cancer in all cases and by anatomic location within the stomach and for esophageal squamous cell carcinoma in the genome-wide scan phase

| Cancer group and chromosome location | NCI dbSNP identifier (major, minor allele) | Per Allele       | Genotype models  |                  | $P_{2df}$              |
|--------------------------------------|--------------------------------------------|------------------|------------------|------------------|------------------------|
|                                      |                                            | OR (95%CI)       | Heterozygous     | Homozygous       |                        |
|                                      |                                            | OR (95%CI)       | OR (95%CI)       | OR (95%CI)       |                        |
| <b>Total Gastric</b>                 |                                            |                  |                  |                  |                        |
| 10q23                                | rs2274223 (A, G)                           | 1.40 (1.25-1.56) | 1.36 (1.19-1.57) | 2.05 (1.53-2.76) | $1.55 \times 10^{-8}$  |
|                                      | rs3765524 (C, T)                           | 1.39 (1.25-1.56) | 1.36 (1.19-1.57) | 2.05 (1.52-2.76) | $1.84 \times 10^{-8}$  |
|                                      | rs3781264 (T, C)                           | 1.51 (1.33-1.70) | 1.54 (1.33-1.78) | 2.08(1.41-3.07)  | $2.80 \times 10^{-10}$ |
|                                      | rs11187842 (C, T)                          | 1.48 (1.31-1.68) | 1.53 (1.32-1.77) | 1.96 (1.31-2.92) | $2.23 \times 10^{-9}$  |
|                                      | rs753724 (G, T)                            | 1.49 (1.31-1.68) | 1.52 (1.32-1.76) | 2.02 (1.36-3.00) | $1.80 \times 10^{-9}$  |
| 1q22                                 | rs4072037 (A, G)                           | 0.71 (0.62-0.82) | 0.68 (0.58-0.79) | 0.66 (0.40-1.10) | $3.04 \times 10^{-6}$  |
|                                      | rs4460629 (C, T)                           | 0.68 (0.59-0.79) | 0.68 (0.58-0.80) | 0.49 (0.26-0.92) | $2.18 \times 10^{-6}$  |
| 22q12                                | rs738722 (C, T)                            | 1.01 (0.91-1.13) | 0.96 (0.83-1.10) | 1.16 (0.88-1.53) | 0.37                   |
|                                      | rs1547014 (C, T) <sup>a</sup>              | 1.01 (0.89-1.13) | 0.90 (0.78-1.04) | 1.46 (1.03-2.07) | 0.022                  |
| 8q24                                 | rs2920297 (T, C) <sup>b</sup>              | 1.07 (0.97-1.19) | 1.16 (1.01-1.33) | 1.03 (0.81-1.31) | 0.10                   |
|                                      | rs2294008 (C, T)                           | 1.07 (0.97-1.19) | 1.16 (1.01-1.33) | 1.03 (0.80-1.31) | 0.091                  |
| <b>Cardia</b>                        |                                            |                  |                  |                  |                        |
| 10q23                                | rs2274223 (A, G)                           | 1.59 (1.41-1.80) | 1.64 (1.40-1.91) | 2.39 (1.74-3.30) | $5.23 \times 10^{-13}$ |
|                                      | rs3765524 (C, T)                           | 1.59 (1.40-1.79) | 1.63 (1.40-1.90) | 2.38 (1.72-3.28) | $8.73 \times 10^{-13}$ |
|                                      | rs3781264 (T, C)                           | 1.66 (1.45-1.90) | 1.73 (1.48-2.04) | 2.38 (1.57-3.61) | $5.32 \times 10^{-13}$ |
|                                      | rs11187842 (C, T)                          | 1.63 (1.42-1.87) | 1.72 (1.46-2.02) | 2.19 (1.42-3.36) | $7.09 \times 10^{-12}$ |
|                                      | rs753724 (G, T)                            | 1.63 (1.42-1.87) | 1.72 (1.46-2.02) | 2.19 (1.42-3.36) | $7.96 \times 10^{-12}$ |
| 1q22                                 | rs4072037 (A, G)                           | 0.75 (0.65-0.88) | 0.72 (0.61-0.86) | 0.72 (0.41-1.26) | $9.86 \times 10^{-4}$  |
|                                      | rs4460629 (C, T)                           | 0.72 (0.61-0.85) | 0.73 (0.61-0.87) | 0.49 (0.23-1.04) | $5.77 \times 10^{-4}$  |
| 22q12                                | rs738722 (C, T)                            | 1.06 (0.94-1.19) | 0.96 (0.82-1.12) | 1.33 (0.99-1.79) | 0.10                   |
|                                      | rs1547014 (C, T) <sup>a</sup>              | 1.09 (0.96-1.24) | 0.96 (0.82-1.13) | 1.71 (1.18-2.49) | 0.011                  |
| 8q24                                 | rs2920297 (T, C) <sup>b</sup>              | 1.00 (0.89-1.12) | 1.06 (0.91-1.23) | 0.92 (0.69-1.21) | 0.56                   |
|                                      | rs2294008 (C, T)                           | 1.00 (0.89-1.12) | 1.06 (0.91-1.24) | 0.92 (0.69-1.21) | 0.53                   |
| <b>Noncardia</b>                     |                                            |                  |                  |                  |                        |
| 10q23                                | rs2274223 (A, G)                           | 1.02 (0.86-1.22) | 0.90 (0.73-1.12) | 1.41 (0.91-2.21) | 0.15                   |
|                                      | rs3765524 (C, T)                           | 1.03 (0.87-1.22) | 0.91 (0.73-1.13) | 1.42 (0.91-2.22) | 0.16                   |
|                                      | rs3781264 (T, C)                           | 1.18 (0.97-1.42) | 1.18 (0.94-1.47) | 1.38 (0.74-2.54) | 0.25                   |
|                                      | rs11187842 (C, T)                          | 1.17 (0.97-1.42) | 1.17 (0.93-1.47) | 1.41 (0.76-2.61) | 0.26                   |
|                                      | rs753724 (G, T)                            | 1.19 (0.99-1.44) | 1.16 (0.92-1.45) | 1.60 (0.88-2.89) | 0.16                   |
| 1q22                                 | rs4072037 (A, G)                           | 0.60 (0.47-0.75) | 0.55 (0.43-0.71) | 0.59 (0.26-1.37) | $1.63 \times 10^{-5}$  |
|                                      | rs4460629 (C, T)                           | 0.59 (0.47-0.75) | 0.57 (0.44-0.74) | 0.52 (0.20-1.36) | $5.56 \times 10^{-5}$  |
| 22q12                                | rs738722 (C, T)                            | 0.93 (0.78-1.10) | 0.96 (0.78-1.18) | 0.79 (0.49-1.27) | 0.61                   |
|                                      | rs1547014 (C, T) <sup>a</sup>              | 0.83 (0.69-1.01) | 0.77 (0.62-0.96) | 0.99 (0.54-1.81) | 0.069                  |
| 8q24                                 | rs2920297 (T, C) <sup>b</sup>              | 1.27 (1.09-1.47) | 1.45 (1.18-1.79) | 1.35 (0.94-1.94) | $1.87 \times 10^{-3}$  |

|             |                               |                  |                  |                  |                         |
|-------------|-------------------------------|------------------|------------------|------------------|-------------------------|
|             | rs2294008 (C, T)              | 1.27 (1.09-1.47) | 1.46 (1.18-1.80) | 1.35 (0.94-1.94) | 1.63 x 10 <sup>-3</sup> |
| <b>ESCC</b> |                               |                  |                  |                  |                         |
| 10q23       | rs2274223 (A, G)              | 1.33 (1.20-1.48) | 1.32 (1.15-1.50) | 1.84 (1.37-2.46) | 7.75 x 10 <sup>-7</sup> |
|             | rs3765524 (C, T)              | 1.34 (1.20-1.49) | 1.32 (1.16-1.51) | 1.83 (1.37-2.47) | 6.32 x 10 <sup>-7</sup> |
|             | rs3781264 (T, C)              | 1.38 (1.22-1.55) | 1.35 (1.17-1.55) | 2.03 (1.39-2.97) | 7.14 x 10 <sup>-7</sup> |
|             | rs11187842 (C, T)             | 1.37 (1.21-1.54) | 1.35 (1.17-1.55) | 1.99 (1.35-2.94) | 1.66 x 10 <sup>-6</sup> |
|             | rs753724 (G, T)               | 1.37 (1.22-1.55) | 1.35 (1.17-1.55) | 2.02 (1.37-2.98) | 1.35 x 10 <sup>-6</sup> |
| 22q12       | rs738722 (C, T)               | 1.32 (1.19-1.45) | 1.22 (1.07-1.39) | 1.96 (1.53-2.50) | 9.94 x 10 <sup>-8</sup> |
|             | rs1547014 (C, T) <sup>a</sup> | 1.33 (1.19-1.48) | 1.23 (1.08-1.40) | 2.22 (1.62-3.06) | 2.79 x 10 <sup>-7</sup> |
| 1q22        | rs4072037(A, G)               | 0.85 (0.75-0.97) | 0.80 (0.69-0.93) | 0.99 (0.64-1.55) | 0.012                   |
|             | rs4460629(C, T)               | 0.86 (0.75-0.99) | 0.82 (0.71-0.96) | 1.01 (0.61-1.69) | 0.038                   |
| 4q23        | rs1042026 (G, A) <sup>c</sup> | 1.03 (0.94-1.14) | 0.98 (0.86-1.12) | 1.15 (0.90-1.46) | 0.45                    |
|             | rs2051428 (C, T)              | 0.98 (0.89-1.07) | 0.96 (0.84-1.10) | 0.97 (0.79-1.19) | 0.83                    |
|             | rs3819197 (T, C)              | 1.02 (0.92-1.12) | 0.96 (0.84-1.10) | 1.12 (0.89-1.41) | 0.43                    |
|             | rs1159918 (G, T)              | 1.05 (0.95-1.17) | 0.99 (0.87-1.13) | 1.25 (0.97-1.62) | 0.21                    |
| 12q24       | rs671 (G, A)                  | 0.91 (0.80-1.03) | 0.96 (0.83-1.11) | 0.65 (0.43-0.98) | 0.11                    |
|             | rs3782886 (A, G)              | 0.92 (0.82-1.04) | 0.96 (0.83-1.11) | 0.71 (0.48-1.06) | 0.22                    |

Results were derived from logistic regression models adjusted for age (10 year categories), sex, and study. There were 1,625 gastric cancer cases (1,110 cardia and 515 noncardia) 1,898 ESCC cases, and 2,100 control subjects. <sup>a</sup> Since the TaqMan assay for this SNP failed validation, we present results for this SNP here, but not in Table 2. <sup>b</sup> This SNP is presented as a proxy for rs2976392, the two SNPs have pair-wise  $r^2$  of 1.0 for the CHB ethnicity in HapMap 2. <sup>c</sup> This SNP is presented as a proxy for rs1229984 the two SNPs have pair-wise  $r^2$  of 0.68 for the CHB ethnicity in HapMap 2.

**Supplementary Table 4.** Association between SNPs at loci with genes involved in alcohol metabolism and risk of esophageal squamous cell carcinoma overall and stratified by alcohol or tobacco use based on subjects in the genome-wide phase

|              |                               |                             | Heterozygote      | Homozygote        |                         |
|--------------|-------------------------------|-----------------------------|-------------------|-------------------|-------------------------|
| Locus        | SNP                           | Strata                      | OR (CI)           | OR (CI)           | $P_{2\text{ df score}}$ |
| <b>ADH1B</b> | rs1159918 (G, T)              | Overall <sup>a</sup>        | 0.99 (0.87-1.13)  | 1.24 (0.96, 1.61) | 0.24                    |
|              |                               | <b>Alcohol</b> <sup>b</sup> |                   |                   |                         |
|              |                               | Never                       | 0.94 (0.79, 1.12) | 1.13 (0.80, 1.61) | 0.54                    |
|              |                               | Ever                        | 1.05 (0.86, 1.28) | 1.37 (0.93, 2.03) | 0.28                    |
|              |                               | <b>Tobacco</b> <sup>c</sup> |                   |                   |                         |
|              |                               | Never                       | 0.88 (0.72, 1.07) | 0.89 (0.60, 1.33) | 0.41                    |
|              |                               | Ever                        | 1.09 (0.91, 1.30) | 1.54 (1.09, 2.18) | 0.046                   |
|              |                               |                             |                   |                   |                         |
|              | rs1042026 (G, A) <sup>d</sup> | Overall <sup>a</sup>        | 0.98 (0.86, 1.12) | 1.14 (0.89, 1.44) | 0.49                    |
|              |                               | <b>Alcohol</b> <sup>b</sup> |                   |                   |                         |
|              |                               | Never                       | 0.94 (0.79, 1.12) | 1.01 (0.73, 1.40) | 0.78                    |
|              |                               | Ever                        | 1.02 (0.84, 1.25) | 1.28 (0.90, 1.84) | 0.39                    |
|              |                               | <b>Tobacco</b> <sup>c</sup> |                   |                   |                         |
|              |                               | Never                       | 0.90 (0.74, 1.10) | 0.84 (0.58, 1.20) | 0.44                    |
|              |                               | Ever                        | 1.05 (0.88, 1.26) | 1.41 (1.02, 1.94) | 0.11                    |
|              |                               |                             |                   |                   |                         |
| <b>ALDH2</b> | rs3782886 (A, G)              | Overall <sup>a</sup>        | 0.99 (0.85, 1.14) | 0.75 (0.50, 1.12) | 0.37                    |
|              |                               | <b>Alcohol</b> <sup>b</sup> |                   |                   |                         |
|              |                               | Never                       | 0.87 (0.73, 1.05) | 0.74 (0.48, 1.13) | 0.18                    |
|              |                               | Ever                        | 1.26 (0.99, 1.61) | 0.69 (0.20, 2.41) | 0.15                    |
|              |                               | <b>Tobacco</b> <sup>c</sup> |                   |                   |                         |
|              |                               | Never                       | 0.82 (0.66, 1.02) | 0.86 (0.48, 1.54) | 0.19                    |
|              |                               | Ever                        | 1.21 (0.98, 1.48) | 0.71 (0.41, 1.25) | 0.063                   |
|              |                               |                             |                   |                   |                         |
|              | rs671 (G, A)                  | Overall <sup>a</sup>        | 0.99 (0.85, 1.14) | 0.69(0.45, 1.04)  | 0.21                    |
|              |                               | <b>Alcohol</b> <sup>b</sup> |                   |                   |                         |
|              |                               | Never                       | 0.86 (0.72, 1.04) | 0.67 (0.43, 1.04) | 0.095                   |
|              |                               | Ever                        | 1.28 (1.00, 1.64) | 0.69 (0.20, 2.41) | 0.12                    |
|              |                               | <b>Tobacco</b> <sup>c</sup> |                   |                   |                         |
|              |                               | Never                       | 0.83 (0.66, 1.03) | 0.83 (0.45, 1.53) | 0.21                    |
|              |                               | Ever                        | 1.20 (0.97, 1.47) | 0.63 (0.35, 1.13) | 0.042                   |
|              |                               |                             |                   |                   |                         |

<sup>a</sup> Results were derived from the overall logistic regression model adjusted for age, sex, study, alcohol, and tobacco use. <sup>b</sup> The proportion of cases and controls that ever consumed alcohol was 59% and 58%, respectively. <sup>c</sup> The proportion of cases and controls that ever smoked tobacco was 48% and 45%, respectively. <sup>d</sup> This SNP is presented as a proxy for rs1229984 the two SNPs have pair-wise  $r^2$  of 0.68 for the CHB ethnicity in HapMap 2.

**Supplementary Figure 1.** Manhattan plots based on  $P$ -values derived from 1 df trend tests from logistic regression models adjusted for age, sex, and study using subjects in the genome-wide phase. These associations were based on 1,625 gastric cancer cases or 1,898 esophageal squamous cell carcinoma cases and 2,100 common control subjects scanned using the Illumina 660W Quad chip. **a.** gastric cancer; **b.** esophageal squamous cell carcinoma

**a. gastric cancer**

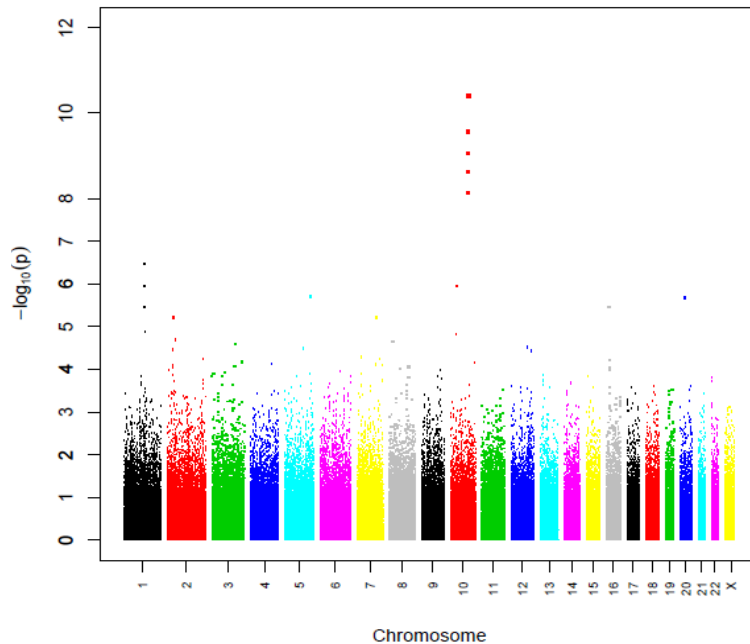

**b. esophageal squamous cell carcinoma**

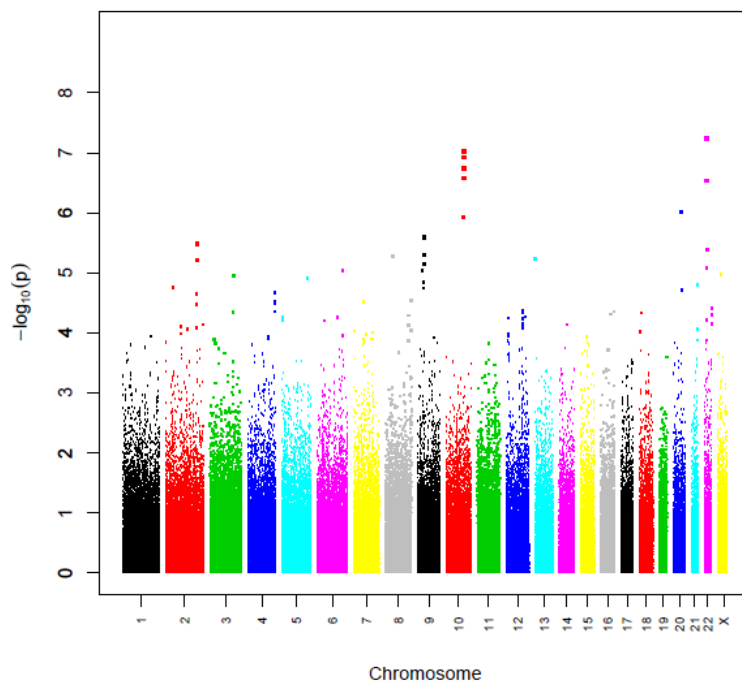

**Supplementary Figure 2.** Association results, recombination, and linkage disequilibrium plots for the region of 22q12 in the genome-wide phase for esophageal squamous cell carcinoma (ESCC). *P*-values were derived from 1 df trend tests in logistic regression models adjusted for age, sex, and study and are shown with the LR values for putative recombination hotspots using SequenceLDhot (vertical bars). Pair-wise  $r^2$  are displayed at the bottom for all SNPs included in the GWAS analysis. Coordinates refer to genome Build 36.1. The figure depicts chromosome 22q12 (27,044,212 – 27,651,008) including the *CHEK2* gene.

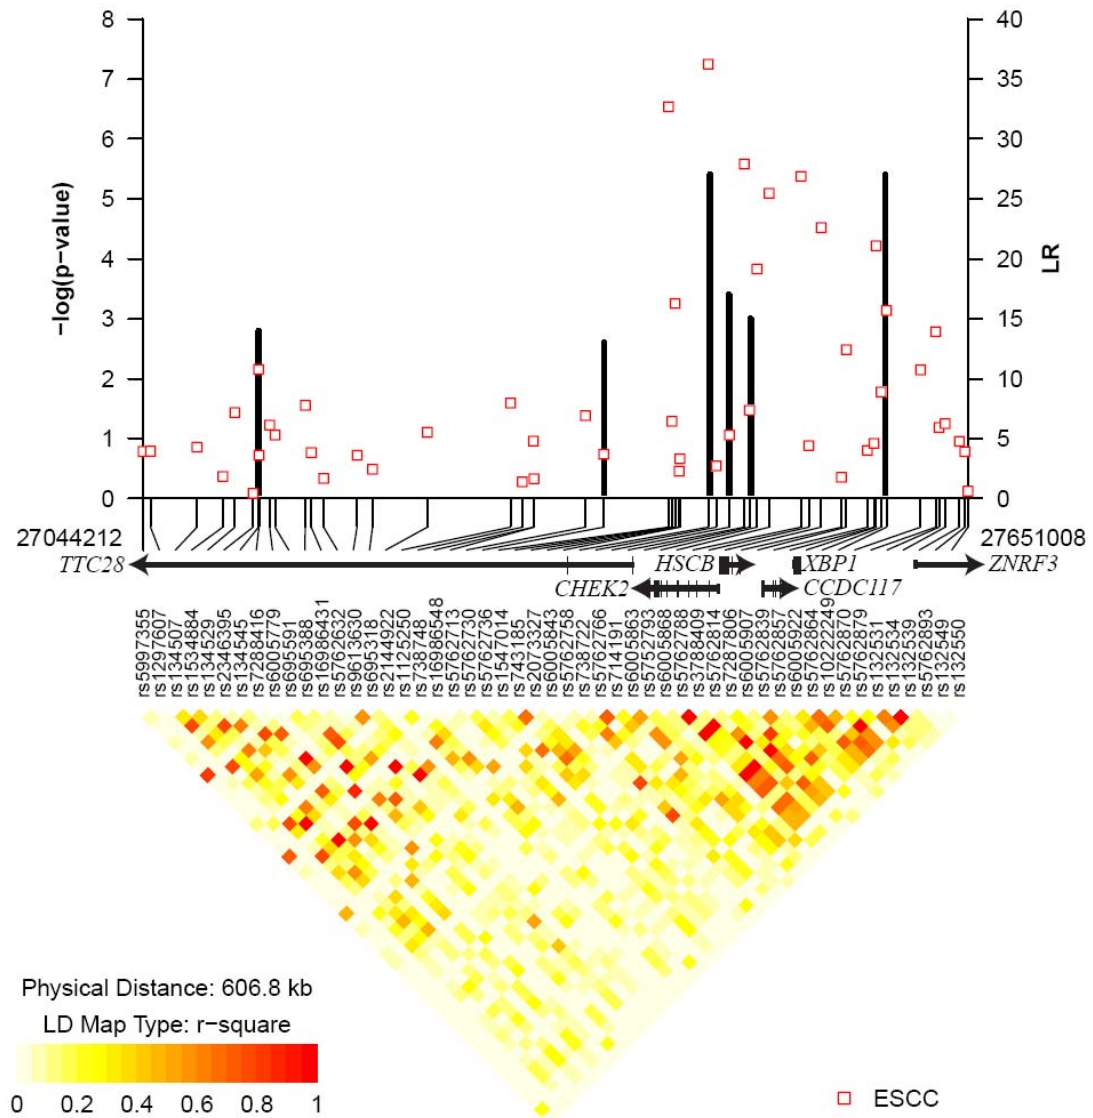



**Supplementary Figure 3.** Plot of admixture, defined by analysis with STRUCTURE, of subjects in the genome-wide phase. The two individuals with <90% Asian ethnicity were removed from further analyses.

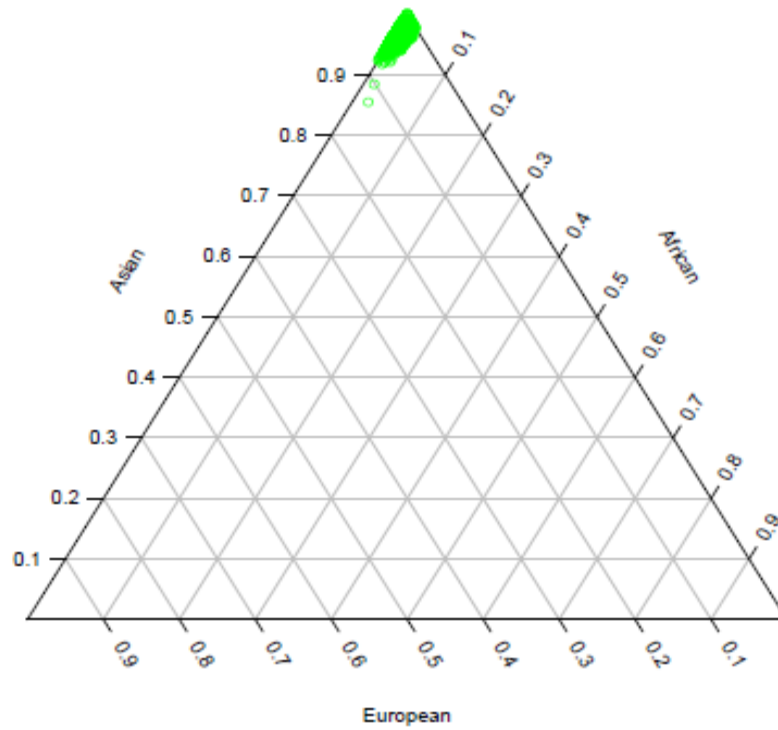

**Supplementary Figure 4.** Quantile-Quantile (Q-Q) plot of observed versus expected P values for the genome-wide association phase. **a.** gastric cancer; **b.** esophageal squamous cell carcinoma.

**a. Gastric cancer**

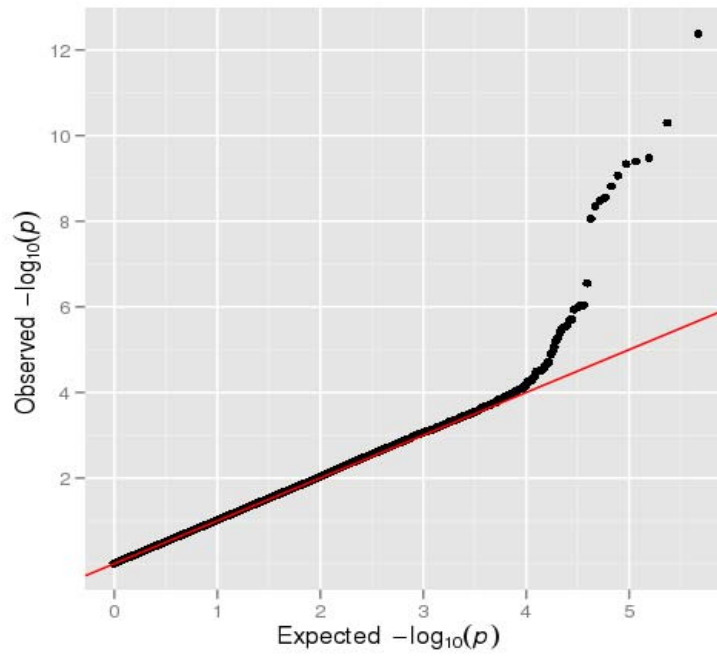

**b. Esophageal squamous cell carcinoma**

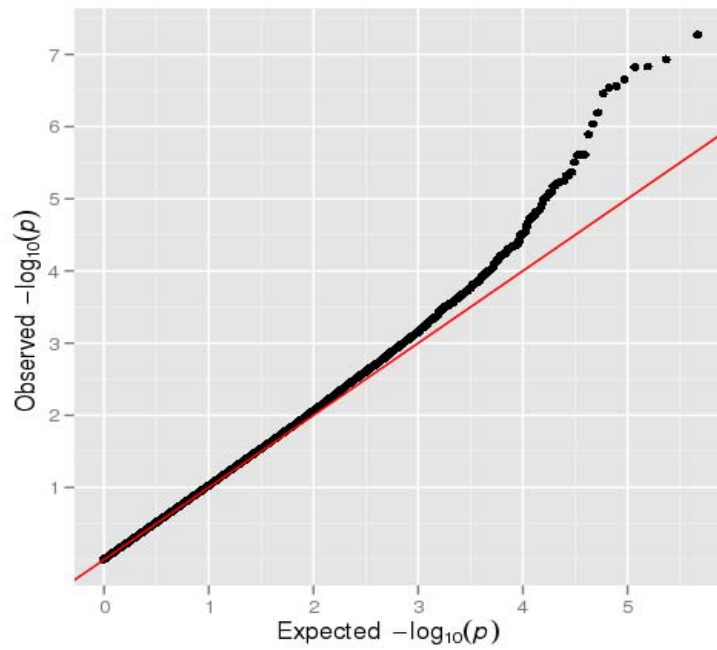

**Supplementary Figure 5.** Illumina plots for two SNPs tested in replication that achieved genome-wide significance in the overall combined analysis. Sample genotype clusters are shown for two SNPs achieving genome-wide significance in the combined analysis: rs2274223 and rs3781264.

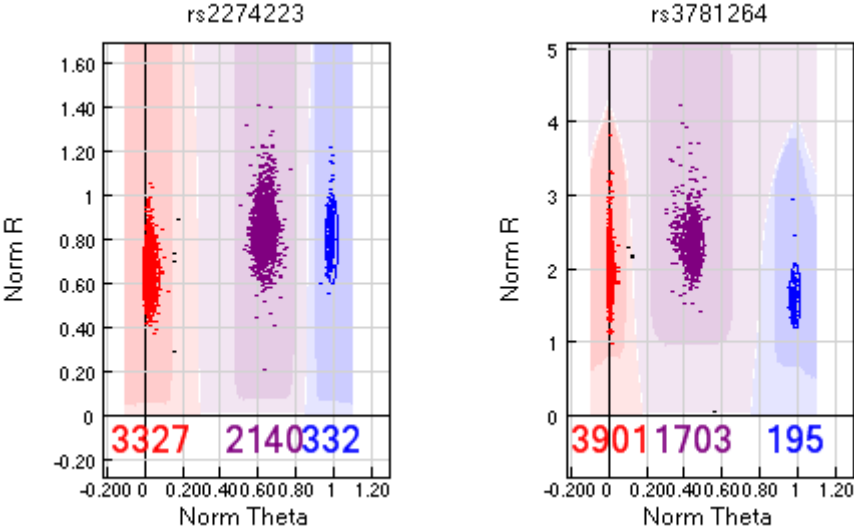

Supplement: NIHMS224275-supplement-1.pdf [file NIHMS224275-supplement-1.pdf]
